# Supplementary material for: optPBN: An Optimisation Toolbox for Probabilistic Boolean Networks
Source: PLoS One. 2014 Jul 1;9(7):e98001. doi: 10.1371/journal.pone.0098001 (PMC4077690; doi:10.1371/journal.pone.0098001)
Supplement: File S6 — Results of optPBN for four case studies. The spread sheet provides a complete set of results generated from the optPBN pipeline for the four case studies. Different numbers of (selection probability) parameter samplings from optimisers and a range of accuracy parameter ‘r’ from 0.01 to 0.05 are explored. Computation time and quality of model fitting were reported for both stand-alone and grid-based versions. (XLSX) [file pone.0098001.s007.xlsx]

## Sheet: Sheet1
Results from the optPBN pipeline for four case studies
*Note: Disc. = Discrete mode, Cont. = Continuous mode, Ext. = Extended model structure, Init. = Initial model tructure
iter. = iterations, Apo. = Apotosis, Delta = difference between steady-state distributions and measurement data
nsteps = length of simulated two-state Markov chain trajectory used to estimate the steady-state probablities
Stand-alone version (Optimiser: Particle swarm algorithm, PSO)
Case study (Model)	Approach	ergodic PBN and two-state Markov chain
Model 1 (Disc.)	Pswarm iter.	r	Time (s)	nsteps	C2(NFkB)	Delta
	1000	0.05	129	101	1 (&)	0
		0.025	305	101	1 (&)	0
		0.01	1578	382	1 (&)	0
	5000	0.05	627	101	1 (&)	0
		0.025	1093	101	1 (&)	0
		0.01	5841	382	1 (&)	0
Model 3 (Disc.)	Pswarm iter.	r	Time (s)	nsteps	C2(NFkB)	Delta	C1(ERK), C3(ERK)	Delta
	1000	0.05	357	101	1 (&)	0	0.5 (|), 0.5 (Lt)	0
		0.025	2194	101	1 (&)	0	0.5 (|), 0.5 (Lt)	0
		0.01	5451	382	1 (&)	0	0.5 (|), 0.5 (Lt)	0
	5000	0.05	1761	101	1 (&)	0	0.5 (|), 0.5 (Lt)	0
		0.025	3011	101	1 (&)	0	0.5 (|), 0.5 (Lt)	0
		0.01	25064	382	1 (&)	0	0.5 (|), 0.5 (Lt)	0
Model 2 (Cont.)	Pswarm iter.	r	Time (s)	nsteps	C1(N3), C3(N3)	Delta
	1000	0.05	150	408	0.6045, 0.3955	0.0045
		0.025	321	1514	0.6087, 0.3913	0.0087
		0.01	1351	10612	0.6090, 0.3910	0.009
	5000	0.05	659	438	0.6237, 0.3763	0.0237
		0.025	1205	1444	0.6041, 0.3959	0.0041
		0.01	7968	10357	0.5979, 0.4021	0.0021
Model 3 (Cont.)	Pswarm iter.	r	Time (s)	nsteps	C1(NFkB), C2(NFkB)	Delta	C1(ERK), C2(ERK)	Delta
	1000	0.02	906	433	0.6934, 0.3066	0.0066	0.5477, 0.4523	0.0523
		0.01	1302	1861	0.6990, 0.3010	0.001	0.6122, 0.3878	0.0122
		0.005	8802	10534	0.6968, 0.3032	0.0032	0.5868, 0.4132	0.0132
	5000	0.02	4384	543	0.6992, 0.3008	0.0008	0.6532, 0.3468	0.0532
		0.01	6151	1861	0.7078, 0.2922	0.0078	0.6028, 0.3972	0.0028
		0.005	48747	10403	0.7016, 0.2984	0.0016	0.6046, 0.3954	0.0046
Model 4 (Cont./Ext.)	Pswarm iter.	r	Time (s)	nsteps	Simulated (Apo.)	Delta	Simulated (NFkB)	Delta
	1000	0.025	16783	376	0.0027 (vs 0)	0.0027	0.0053 (vs 0)	0.0053
				1505	0.4133 (vs 0.63)	0.2167	0.2970 (vs 0.32)	0.023
				1725	0.0017 (vs 0)	0.0017	0.5843 (vs 1)	0.4157
				1667	0.0012 (vs 0.1)	0.0988	0.6029 (vs 0.98)	0.3771
				815	0.7963 (vs 1)	0.2037	0.0025 (vs 0.26)	0.2575
				2029	0.2617 (vs 0.49)	0.2283	0.4421 (vs 0.46)	0.0179
				Sum Delta (2 nodes) = 1.8484 ; SSE (3 nodes) = 0.7527
	5000	0.025	45503	457	0.0066 (vs 0)	0.0066	0.0022 (vs 0)	0.0022
				1346	0.6218 (vs 0.63)	0.0082	0.2117 (vs 0.32)	0.1083
				549	0 (vs 0)	0	0.9271 (vs 1)	0.0729
				1630	0.0006 (vs 0.1)	0.0994	0.7571 (vs 0.98)	0.2229
				101	0.9406 (vs 1)	0.0594	0.0099 (vs 0.26)	0.2501
				1819	0.4766 (vs 0.49)	0.0134	0.3090 (vs 0.46)	0.151
				Sum Delta (2 nodes) = 0.9944 ; SSE (3 nodes) = 0.2138
	Cij	Best run		Cost ->	0.1939	Value
	C1(NFkB)	NF_kB = ( ~I_kBa | ~I_kBe )				0.7982
	C2(NFkB)	NF_kB = ( ~I_kBa | ~I_kBe ) | ( C8a | C8a_2 )				0.2018
	C1(complex2)	complex2 = ( complex1&FADD )				0.7517
	C2(complex2)	complex2 = ( complex1&FADD&RIP_deubi )				0.2483
	Cij	Mean (500/5000 runs)		Cost ->	0.2681	Mean	S.D.
	C1(NFkB)	NF_kB = ( ~I_kBa | ~I_kBe )				0.8036	0.0433
	C2(NFkB)	NF_kB = ( ~I_kBa | ~I_kBe ) | ( C8a | C8a_2 )				0.1964	0.0433
	C1(complex2)	complex2 = ( complex1&FADD )				0.669	0.0739
	C2(complex2)	complex2 = ( complex1&FADD&RIP_deubi )				0.331	0.0739
Grid-based version (Optimisers: Differential evolution [DE] + Evolutionary algorithm [EA], 80 cores)
Run-time analysis (Table 4)
Case study (model)	G5K iter.	r	Stand-alone (1 core)		Grid-based (80 cores)		Improvement (folds)
Model 1	1000	0.025	305s (5m5s)		8s		38.1
	5000		1093s (18m13s)		16s		68.3
Model 2	1000		321s (5m21s)		9s		35.7
	5000		1205s (20m5s)		16s		75.3
Model 3 (Cont.)	1000		1302s (21m42s)		18s		72.3
	5000		6151s (1h42m31s)		39s		157.7
Model 4 (Cont./Ext.)	1000		16783s (4h39m43s)		99s (1m39s)		169.5
	5000		45503s (12h38m23s)		259s (4m19s)		175.7
Optimisation results of case study 4
Case study (model)	G5K iter.
Model 4 (Cont./Ext.)	15000	r	Time (s)	nsteps	Simulated (Apo.)	Delta	Simulated (NFkB)	Delta
		0.025	634	880	0.0054 (vs 0)	0.0054	0.0027 (vs 0)	0.0027
				919	0.717 (vs 0.63)	0.087	0.1501 (vs 0.32)	0.1699
				817	0.0063 (vs 0)	0.0063	0.8481 (vs 1)	0.1519
				1667	0.0018 (vs 0.1)	0.0982	0.8723 (vs 0.98)	0.1077
				119	0.9868 (vs 1)	0.0132	0.0033 (vs 0.26)	0.2567
				1366	0.4914 (vs 0.49)	0.0014	0.2932 (vs 0.46)	0.1668
			80 cores	Sum Delta (2 nodes) = 1.0672 ; SSE (3 nodes) = 0.1987
	Cij	Best run		Cost ->	0.176	Value
	C1(NFkB)	NF_kB = ( ~I_kBa | ~I_kBe )				0.8544
	C2(NFkB)	NF_kB = ( ~I_kBa | ~I_kBe ) | ( C8a | C8a_2 )				0.1456
	C1(complex2)	complex2 = ( complex1&FADD )				1
	C2(complex2)	complex2 = ( complex1&FADD&RIP_deubi )				0
	Cij	Mean (500/7500 runs)		Cost ->	0.1994	Mean	S.D.
	C1(NFkB)	NF_kB = ( ~I_kBa | ~I_kBe )				0.8354	0.0209
	C2(NFkB)	NF_kB = ( ~I_kBa | ~I_kBe ) | ( C8a | C8a_2 )				0.1646	0.0209
	C1(complex2)	complex2 = ( complex1&FADD )				0.848	0.1105
	C2(complex2)	complex2 = ( complex1&FADD&RIP_deubi )				0.152	0.1105
Model 4 (Cont./Init.)	15000	r	Time (s)	nsteps	Simulated (Apo.)	Delta	Simulated (NFkB)	Delta
		0.025	580	880	0 (vs 0)	0	0.0168 (vs 0)	0.0168
				608	0.9208 (vs 0.63)	0.2908	0.0198 (vs 0.32)	0.3002
				815	0.0028 (vs 0)	0.0028	0.8873 (vs 1)	0.1127
				1723	0.002 (vs 0.1)	0.098	0.7889 (vs 0.98)	0.1911
				101	0.992 (vs 1)	0.008	0.0023 (vs 0.26)	0.2577
				1494	0.4681 (vs 0.49)	0.0219	0.3083 (vs 0.46)	0.1517
			80 cores	Sum Delta (2 nodes) = 1.4517 ; SSE (3 nodes) = 0.3275
	Cij	Best run		Cost ->	0.2668	Value
	C1(complex2)	complex2 = ( complex1&FADD )				0.7524
	C2(complex2)	complex2 = ( complex1&FADD&RIP_deubi )				0.2476
	Cij	Mean (500/7500 runs)		Cost ->	0.2869	Mean	S.D.
	C1(complex2)	complex2 = ( complex1&FADD )				0.8351	0.1114
	C2(complex2)	complex2 = ( complex1&FADD&RIP_deubi )				0.1649	0.1114
Pooled Grid-based results from 3 separated runs (Extended structure of Model 4)
Pooled Model 4 (Ext)	Cij	Mean (500*3 runs)		Cost ->	0.2043	Mean	S.D.
	C1(NFkB)	NF_kB = ( ~I_kBa | ~I_kBe )				0.831	0.0304
	C2(NFkB)	NF_kB = ( ~I_kBa | ~I_kBe ) | ( C8a | C8a_2 )				0.169	0.0304
	C1(complex2)	complex2 = ( complex1&FADD )				0.7899	0.1716
	C2(complex2)	complex2 = ( complex1&FADD&RIP_deubi )				0.2101	0.1716
