# Supplementary material for: optPBN: An Optimisation Toolbox for Probabilistic Boolean Networks
Source: PubMed Central journal article supplement (PMC4077690; doi:10.1371/journal.pone.0098001), 2014-07-01
Supplement: pone.0098001.s001.pdf [file pone.0098001.s001.pdf]

**A** Model structure of the original Toy model (adapted from Saez-Rodriguez *et al.*, doi: 10.1038/msb.2009.87)

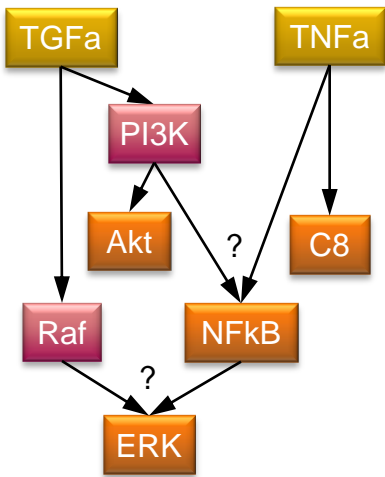

| Exp | Input |      |       |      |
|-----|-------|------|-------|------|
|     | TGFa  | TNFa | PI3Ki | Rafi |
| A   | 1     | 0    | -     | -    |
| B   | 0     | 1    | -     | -    |
| C   | 1     | 1    | -     | -    |
| D   | 1     | 0    | +     | -    |
| E   | 1     | 1    | +     | -    |
| F   | 1     | 0    | -     | +    |

| Exp | Output |     |    |     |
|-----|--------|-----|----|-----|
|     | NFkB   | ERK | C8 | Akt |
| A   | 0      | 1   | 0  | 1   |
| B   | 0      | 0   | 1  | 0   |
| C   | 1      | 1   | 1  | 1   |
| D   | 0      | 1   | 0  | 0   |
| E   | 0      | 1   | 1  | 0   |
| F   | 0      | 0   | 0  | 1   |

**B** CellNOpt results adapted from the original article of Saez-Rodriguez *et al.* (doi: 10.1038/msb.2009.87)

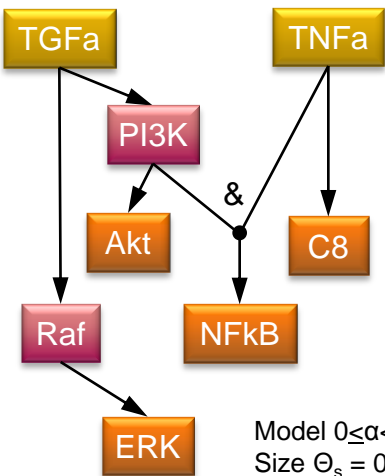

Model  $0 \leq \alpha < 0.23$   
Size  $\Theta_s = 0.58$

**C** Result from the optimization with optPBN toolbox in discrete optimization mode; Left: NFkB, Right: ERK

*NFkB*

| Exp |             | &               | PI3K        | TNFa        | $\emptyset$ |
|-----|-------------|-----------------|-------------|-------------|-------------|
| All | $\times(0)$ | $\checkmark(1)$ | $\times(0)$ | $\times(0)$ | $\times(0)$ |

*ERK*

| Exp |                   | &           | Raf               | NFkB        | $\emptyset$ |
|-----|-------------------|-------------|-------------------|-------------|-------------|
| All | $\checkmark(0.5)$ | $\times(0)$ | $\checkmark(0.5)$ | $\times(0)$ | $\times(0)$ |
