# Supplementary material for: optPBN: An Optimisation Toolbox for Probabilistic Boolean Networks
Source: PubMed Central journal article supplement (PMC4077690; doi:10.1371/journal.pone.0098001), 2014-07-01
Supplement: pone.0098001.s010.pdf [file pone.0098001.s010.pdf]

## ***Installation & execution guide for the grid-based version of optPBN toolbox***

The grid-based version of *optPBN* toolbox can be downloaded from SourceForge at <https://sourceforge.net/projects/optpbn>. Please type the password 'SysbioUL' upon the extraction of the compressed optPBN toolbox (in zip format) if asked.

Once the toolbox is placed on the working directory of a cluster or of a grid-based infrastructure such as Grid'5000, please run the installation file 'installOptPBN.sh' e.g., by using the command './installOptPBN.sh' on Linux operation system. A detailed description of the installation file is provided below.

---

---

### **#1 create the installs and lower level directories, namely for MCR, MPICH2 and LibXML**

```
cd ~ && mkdir installs
mkdir installs/mcr
mkdir installs/mpich2
mkdir installs/libxml2
```

### **#2 copy the paradiseo archive into the installs directory and uncompress**

```
cp optPBNInstall/kits/paradiseo-1.1.bz2 installs/ && cd installs
tar xvjf paradiseo-1.1.bz2
```

### **#3 uncompress and install mpich2, libxml and gsl(located in the lib subfolder)**

```
cd paradiseo-1.1/lib

tar xvzf mpich2-1.0.3.tar.gz
cd mpich2-1.0.3
./configure --prefix=$HOME/installs/mpich2/ && make && make install
```

```
cd .. && tar xvjf libxml2-2.6.0.tar.bz2 && cd libxml2-2.6.0
./configure --prefix=$HOME/installs/libxml2/ && make && make install
```

```
# !! IMPORTANT !! if your system already provides a libxml library, e.g. in /usr/lib, symbolic links
should be created instead
# in the ~/installs/libxml2/lib directory (modify the symbolic links already present in
~/installs/libxml2/lib to point to the system library)
# the ln command can be used to create symbolic links (-s option); overseeing this step might
cause the installation to fail!
```

```
cd ~/optPBNInstall/kits
tar xvzf gsl-1.15.tar.gz && cd gsl-1.15
./configure --prefix=$HOME/installs
make && make install
```

#### **#4 set environment and variables**

```
echo 'export
PATH=$HOME/installs/bin:$HOME/installs/mpich2/bin:$HOME/installs/libxml2/bin/:$PATH' >>
~/bashrc
echo 'export
PATH=$HOME/installs/bin:$HOME/installs/mpich2/bin:$HOME/installs/libxml2/bin/:$PATH' >>
~/bash_profile
echo 'export
LD_LIBRARY_PATH=$HOME/installs/lib:$HOME/installs/mpich2/lib/:$HOME/installs/libxml2/lib
:$LD_LIBRARY_PATH' >> ~/bashrc
echo 'export
LD_LIBRARY_PATH=$HOME/installs/lib:$HOME/installs/mpich2/lib/:$HOME/installs/libxml2/lib
:$LD_LIBRARY_PATH' >> ~/bash_profile
```

```
echo 'export LD_LIBRARY_PATH=$HOME/optPBNInstall/workspace/sysb-
opt/src/libs:$LD_LIBRARY_PATH' >> ~/bashrc
echo 'export LD_LIBRARY_PATH=$HOME/optPBNInstall/workspace/sysb-
opt/src/libs:$LD_LIBRARY_PATH' >> ~/bash_profile
```

```
echo 'export
LD_LIBRARY_PATH=$HOME/installs/mcr/v78/runtime/glnxa64:$LD_LIBRARY_PATH' >>
~/bashrc
echo 'export
LD_LIBRARY_PATH=$HOME/installs/mcr/v78/runtime/glnxa64:$LD_LIBRARY_PATH' >>
~/bash_profile
```

```
echo 'export LD_LIBRARY_PATH=$HOME/optPBNInstall/workspace/sysb-  
opt/src/libs:$LD_LIBRARY_PATH' >> ~/.bashrc
```

```
echo 'export MCR_INHIBIT_CTF_LOCK=1' >> ~/.bashrc  
echo 'export MCR_INHIBIT_CTF_LOCK=1' >> ~/.bash_profile  
source ~/.bashrc
```

```
echo 'MPD_SECRETWORD=secretw' > ~/.mpd.conf  
chmod 600 ~/.mpd.conf
```

#### **#5 install ParadisEO [ version 1.1 ]: EO+MO+MOEO+PEO**

```
cd ~/installs/paradiseo-1.1/paradiseo-eo/build/  
rm -fr * && cmake ../ -Dconfig=$HOME/installs/paradiseo-1.1/install.cmake  
make
```

```
cd ../../paradiseo-mo/build/  
rm -fr * && cmake ../ -Dconfig=$HOME/installs/paradiseo-1.1/install.cmake  
make
```

```
cd ../../paradiseo-moeo/build  
rm -fr * && cmake ../ -Dconfig=$HOME/installs/paradiseo-1.1/install.cmake  
make
```

```
cd ../../paradiseo-peo/build  
rm -fr * && cmake ../ -Dconfig=$HOME/installs/paradiseo-1.1/install.cmake  
make
```

#### **#6 install MCR [ choose option 1, i.e. Next, and then specify the /home/{username}/installs/mcr directory, choose Next when prompted, end with Finish ]**

```
cd ~/optPBNInstall/kits  
chmod +x MCRInstaller.bin  
./MCRInstaller.bin -console
```

#### **#7 compile the project**

```
cd ~/optPBNInstall/workspace/sysb-opt/src/libs/source/example/src  
chmod +x compile.grid && ./compile.grid  
cp example.exports libexample.ctf libexample.exports libexample.h libexample.so ../../..  
cd ~/optPBNInstall/workspace/sysb-opt
```

```
./autogen.sh --with-EODir=$HOME/installs/paradiseo-1.1/paradiseo-eo/ --with-  
MODir=$HOME/installs/paradiseo-1.1/paradiseo-mo/ --with-  
MOEOdir=$HOME/installs/paradiseo-1.1/paradiseo-moeo --with-  
paradisEOdir=$HOME/installs/paradiseo-1.1/paradiseo-peo
```

make

**#8 run once to extract the .ctf contents**

```
cd src
./sysbexample
```

**#9 Grid5000 ONLY:**

```
# make a reservation
oarsub -I -l /nodes=10,walltime=0:90
```

```
#verify the nodes
cat $OAR_FILE_NODES | uniq > machines
for i in `cat machines`; do oarsh $i 'hostname -f'; done
```

```
#start the MPI daemons
mpdboot -n 10 -f machines --rsh=/usr/bin/oarsh
```

```
#adjust the schema.xml file if needed as to match the number of resources and run (in this case
using 80 processes)
```

```
#note that the node indexing starts at 0; the last node has in this case the label 79
```

```
#execute MPI and record computational time
{ time mpiexec -n 80 ./sysbexample @alg.param estim_Case_study_4_Extended.mat; } 2>&1 |
tee TimeOutput.log
```

```
#shutdown the MPI daemons (after complete the optimisation task)
mpdallexit
```

---

The installation process is mostly automated. There is only one step (Step #6: Install Matlab Compiler Runtime, MCR) that requires user's interaction to set the installation path. If you install the toolbox on Grid'5000 (registration for an account required), you can proceed with an example of resources reservation and execution of an optimisation task by following the commands in step #9.
